# Supplementary material
Source: PubMed Central journal article supplement (PMC4623594)
Supplement: NIHMS730435-supplement-Supporting_Info.pdf [file NIHMS730435-supplement-Supporting_Info.pdf]

# ADVANCED FUNCTIONAL MATERIALS

## Supporting Information

for *Adv. Funct. Mater.*, DOI: 10.1002/adfm.201501489

**A Highly Elastic and Rapidly Crosslinkable Elastin-Like  
Polypeptide-Based Hydrogel for Biomedical Applications**

*Yi-Nan Zhang, Reginald K. Avery, Queralt Vallmajo-Martin,  
Alexander Assmann, Andrea Vegh, Adnan Memic, Bradley D.  
Olsen, Nasim Annabi,\* and Ali Khademhosseini\**

## Supporting Information

A Highly Elastic and Rapidly Crosslinkable Elastin-Like Polypeptide-Based Hydrogel for Biomedical Applications

*Yi-Nan Zhang, Reginald K. Avery, Queralt Vallmajo-Martin, Alexander Assmann, Andrea Vegh, Adnan Memic, Bradley D. Olsen, Nasim Annabi\*, Ali Khademhosseini\**

The complete protein sequence is as follows:

MGWGSKCTSASGLVGVPGVGVPGVGVIPGVGVPGVGVPGVGVPGVGVPGVGVPGVGVIPGVGV  
VPGVGVPGVGVPGVGVPGVGVIPGVGVPGVGVPGVGVPGVGVPGVGVIPGVGVPGVGVPGVGV  
VPGVGVPGVGVPGVGVIPGVGVPGVGVPGVGVPGVGVPGVGVIPGVGVPGVGVPGVGVPGVGV  
VPGVGVPGVGVIPGVGVPGVGVPGVGVPGVGVPGVGVIPGVGVPGVGVPGVGVPGVGVPGVGV  
VPGVGVIPGVGVPGVGVPGVGVPGVGVPGVGVIPGVGVPGVGVPGVGVPGVGVPGVGVPGVGV  
PGVGVPGVGVPGVGVPGVGVPGVGVIPGVGVPGVGVPGVGVPGVGVPGVGVPGVGVIPGVGV  
GVGVPGVGVPGVGVPGVGVIPGVGVPGVGVPGVGETTSKCTS\*

The ELP was designed as a pentapeptide repeat of hydrophobic amino acids, with abbreviated sequence:

[[VPGVG]<sub>4</sub>IPGVG]<sub>14</sub>.

The complete nucleotide sequence of the completed gene is as follows, with the cysteine containing sequence (KCTS) italicized and the ELP gene in normal type:

GGATCCAAATGTACCAGCGCTAGCGGTCTCGTTGGTGTACCTGGTGTGGCGTCCC  
GGGTGTAGGTATCCCAGGCGTTGGTGTACCGGGTGTAGGCGTTCCAGGCGTTGGT  
GTACCTGGTGTGGCGTCCCAGGCGTTGGTGTACCTGGTGTGGCGTCCCAGGCGTTGGTGTACCGGGT  
TAGGCGTTCCAGGCGTTGGTGTACCTGGTGTGGCGTCCCAGGCGTTGGTGTACCGGGT  
AGGCGTTGGTGTACCGGGTGTAGGCGTTCCAGGCGTTGGTGTACCTGGTGTGGC  
GTCCCAGGCGTTAGGTATCCCAGGCGTTGGTGTACCGGGTGTAGGCGTTCCAGGCG  
TTGGTGTACCTGGTGTGGCGTCCCAGGCGTTAGGTATCCCAGGCGTTGGTGTACC  
GGGTGTAGGCGTTCCAGGCGTTGGTGTACCTGGTGTGGCGTCCCAGGCGTTAGGT  
ATCCCAGGCGTTGGTGTACCGGGTGTAGGCGTTCCAGGCGTTGGTGTACCTGGT  
TTGGCGTCCCAGGCGTTAGGTATCCCAGGCGTTGGTGTACCGGGTGTAGGCGTTCC  
AGGCGTTGGTGTACCTGGTGTGGCGTCCCAGGCGTTAGGTATCCCAGGCGTTGGT  
GTACCGGGTGTAGGCGTTCCAGGCGTTGGTGTACCTGGTGTGGCGTCCCAGGCG  
TAGGTATCCCAGGCGTTGGTGTACCGGGTGTAGGCGTTCCAGGCGTTGGTGTACC  
TGGTGTGGCGTCCCAGGCGTTAGGTATCCCAGGCGTTGGTGTACCGGGTGTAGG  
GTTCCAGGCGTTGGTGTACCTGGTGTGGCGTCCCAGGCGTTAGGTATCCCAGGCG  
TTGGTGTACCGGGTGTAGGCGTTCCAGGCGTTGGTGTACCTGGTGTGGCGTCCC  
GGGTGTAGGTATCCCAGGCGTTGGTGTACCGGGTGTAGGCGTTCCAGGCGTTGGT  
GTACCTGGTGTGGCGTCCCAGGCGTTAGGTATCCCAGGCGTTGGTGTACCGGGT  
TAGGCGTTCCAGGCGTTGGTGTACCTGGTGTGGCGTCCCAGGCGTTAGGTATCCC  
AGGCGTTGGTGTACCGGGTGTAGGCGTTCCAGGCGTTGGTGAGACCACTAGTTAA  
ATGAATAAATGCACGTCCTAAAAGCTT

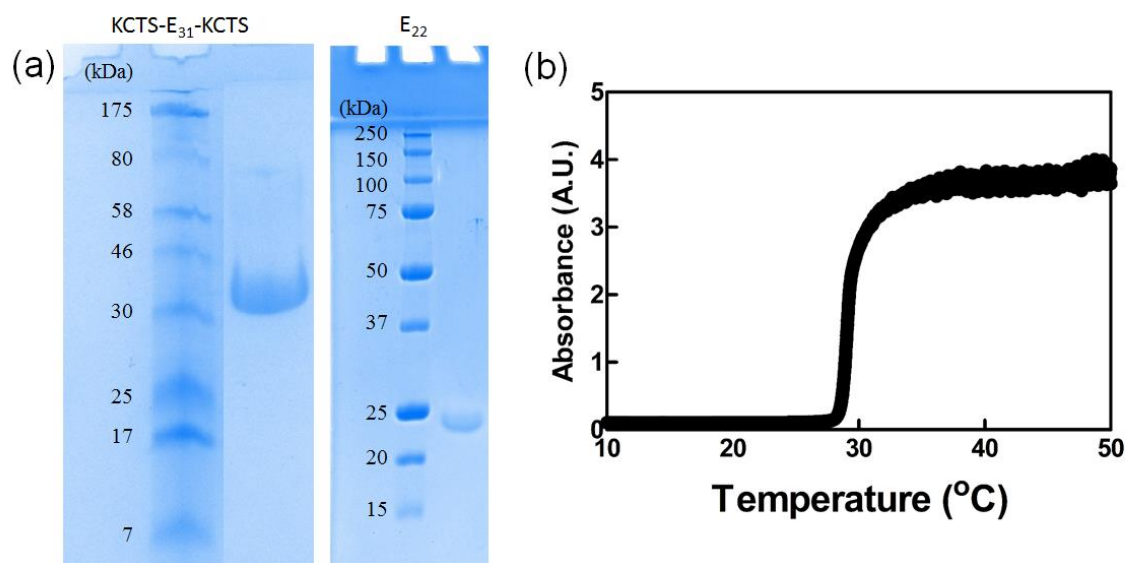

**Figure S1.** (a) Protein gel of KCTS-E<sub>31</sub>-KCTS and E<sub>22</sub> proteins after purification. (b) UV-Vis plot showing the transition temperature of a 1% (w/v) solution of ELP.

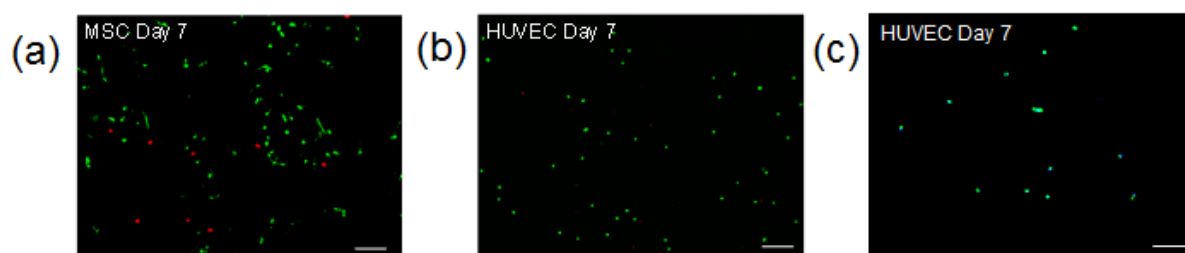

**Figure S2.** *In vitro* cell seeding on ELP hydrogels. (a-b) Calcein-AM (green)/ethidium homodimer (red) LIVE/DEAD assay on ELP hydrogels seeding with MSCs (a) or HUVECs (b) at day 7 of culture (scale bar = 200  $\mu$ m). (c) Phalloidin (green)/DAPI (blue) staining for F-actin/cell nuclei of ELP with HUVECs at day 7 of incubation (scale bar = 100  $\mu$ m).

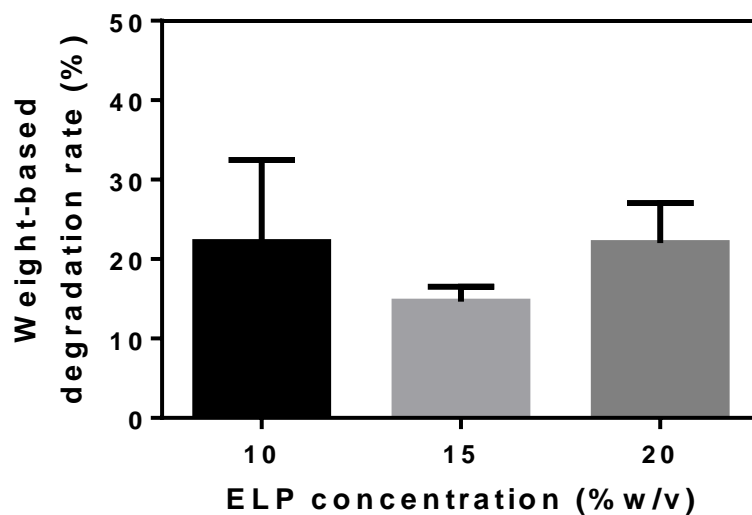

**Figure S3.** Enzymatic degradation rate of ELP gels *in vitro* with digestion with proteinase K for 6 hours.

**Table S1.** Mechanical characterization of photocrosslinked ELP hydrogels.

| ELP concentration (% (w/v)) | Elastic modulus (kPa) | Stress at break (kPa) | Strain at break (%) | Compressive modulus (kPa) | Energy loss (%) |
|-----------------------------|-----------------------|-----------------------|---------------------|---------------------------|-----------------|
| 10                          | 1.28 ± 0.17           | 6.46 ± 0.35           | 419 ± 25            | 3.01 ± 0.44               | 35.13 ± 2.55    |
| 15                          | 1.72 ± 0.11           | 7.71 ± 0.53           | 395 ± 10            | 6.15 ± 0.28               | 42.10 ± 4.37    |
| 20                          | 2.21 ± 0.36           | 10.09 ± 1.81          | 388 ± 12            | 13.05 ± 1.20              | 51.15 ± 2.90    |
